# Supplementary material for: Gradients of Variation in the At-Vessel Mortality Rate between Twelve Species of Sharks and Skates Sampled through a Fishery-Independent Trawl Survey in the Asinara Gulf (NW Mediterranean Sea)
Source: MDPI journal article supplement (doi:10.3390/biology12030363), 2023-02-24
Supplement: s1 [file s1]

**Table S1.** Factor loadings of active and supplementary (asterisked) variables as resulted from the Principal Component Analysis applied to detect differences in the vitality rate of twelve species of elasmobranchs sampled during a fishery independent trawl survey in the Asinara Gulf during June-October 2022.

| Variable    | Extracted Factors |           |           |
|-------------|-------------------|-----------|-----------|
|             | 1                 | 2         | 3         |
| Dead        | 0.916034          | 0.401043  | -0.006758 |
| Inactive    | 0.103955          | -0.994571 | -0.004641 |
| Active      | -0.961552         | 0.274534  | -0.006940 |
| *TL         | -0.129174         | -0.044903 | -0.016858 |
| *Mean depth | 0.736540          | 0.010067  | -0.003280 |
| *Sharks     | 0.079007          | 0.375993  | 0.002949  |
| *Skates     | -0.079007         | -0.375993 | -0.002949 |
