# Supplementary material for: Gradients of Variation in the At-Vessel Mortality Rate between Twelve Species of Sharks and Skates Sampled through a Fishery-Independent Trawl Survey in the Asinara Gulf (NW Mediterranean Sea)
Source: MDPI journal article supplement (doi:10.3390/biology12030363), 2023-02-24
Supplement: s1 [file s1]

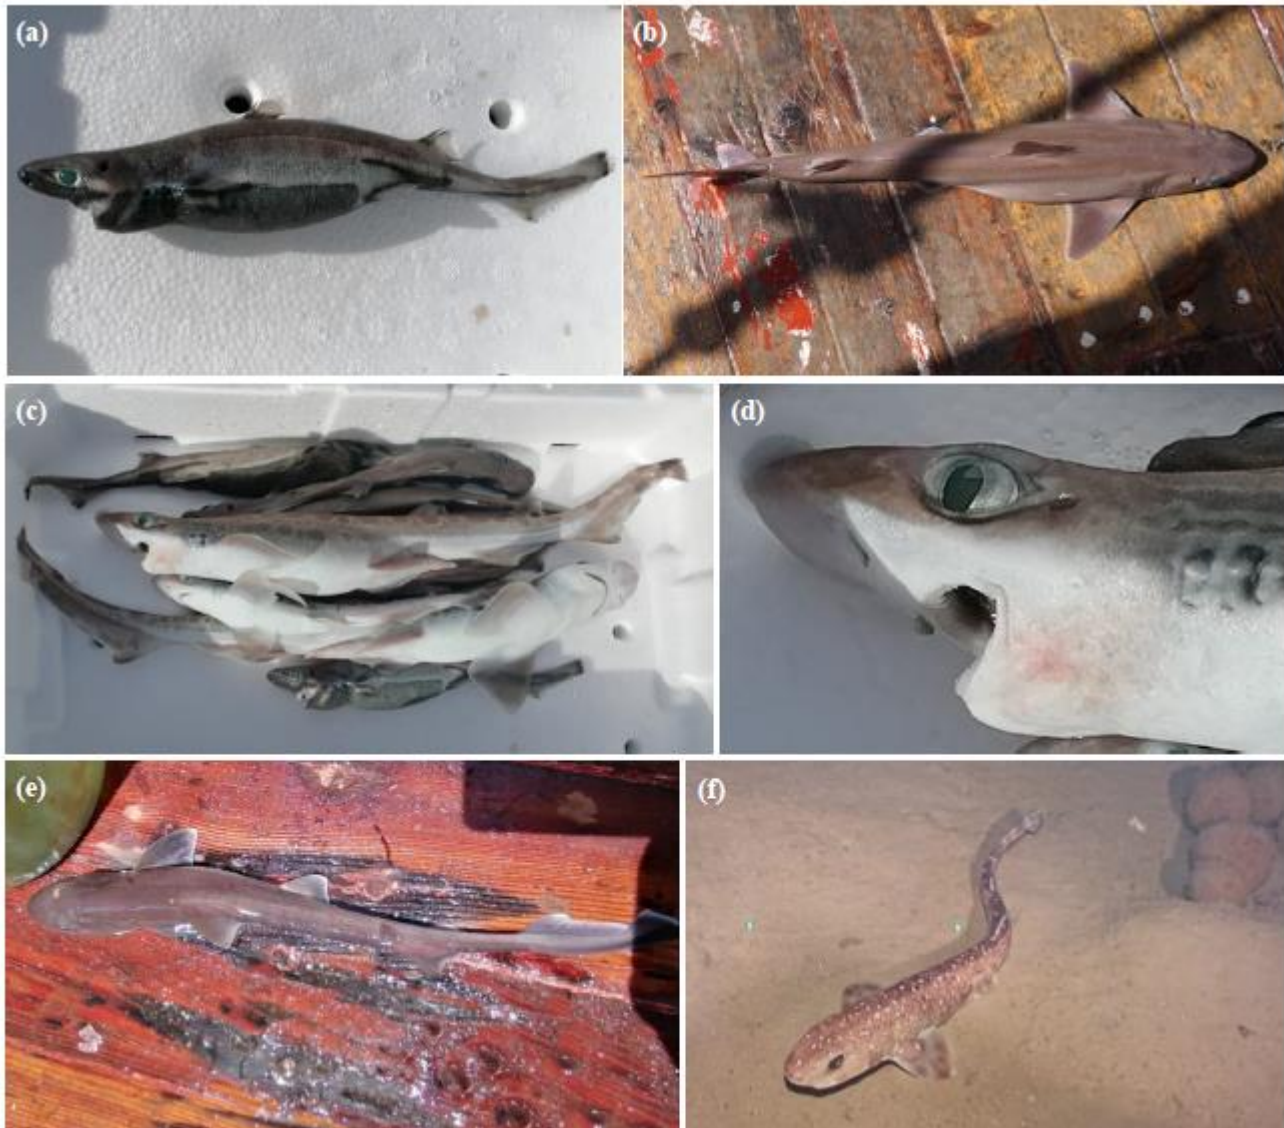

**Figure S1.** Images of the shark species sampled during a fishery independent trawl survey in the Asinara Gulf during June-October 2022. (a) *Etmopterus spinax*, (b) *Squalus acanthias*, (c) *Galeus melastomus*, (d) close-up of a specimen of *G. melastomus* with an oedema over the skin of the lower jaw, (e) *Mustelus mustelus*, and (f) *Scyliorhinus canicula* (ROV footage).
