# Supplementary material for: Gradients of Variation in the At-Vessel Mortality Rate between Twelve Species of Sharks and Skates Sampled through a Fishery-Independent Trawl Survey in the Asinara Gulf (NW Mediterranean Sea)
Source: MDPI journal article supplement (doi:10.3390/biology12030363), 2023-02-24
Supplement: s1 [file s1]

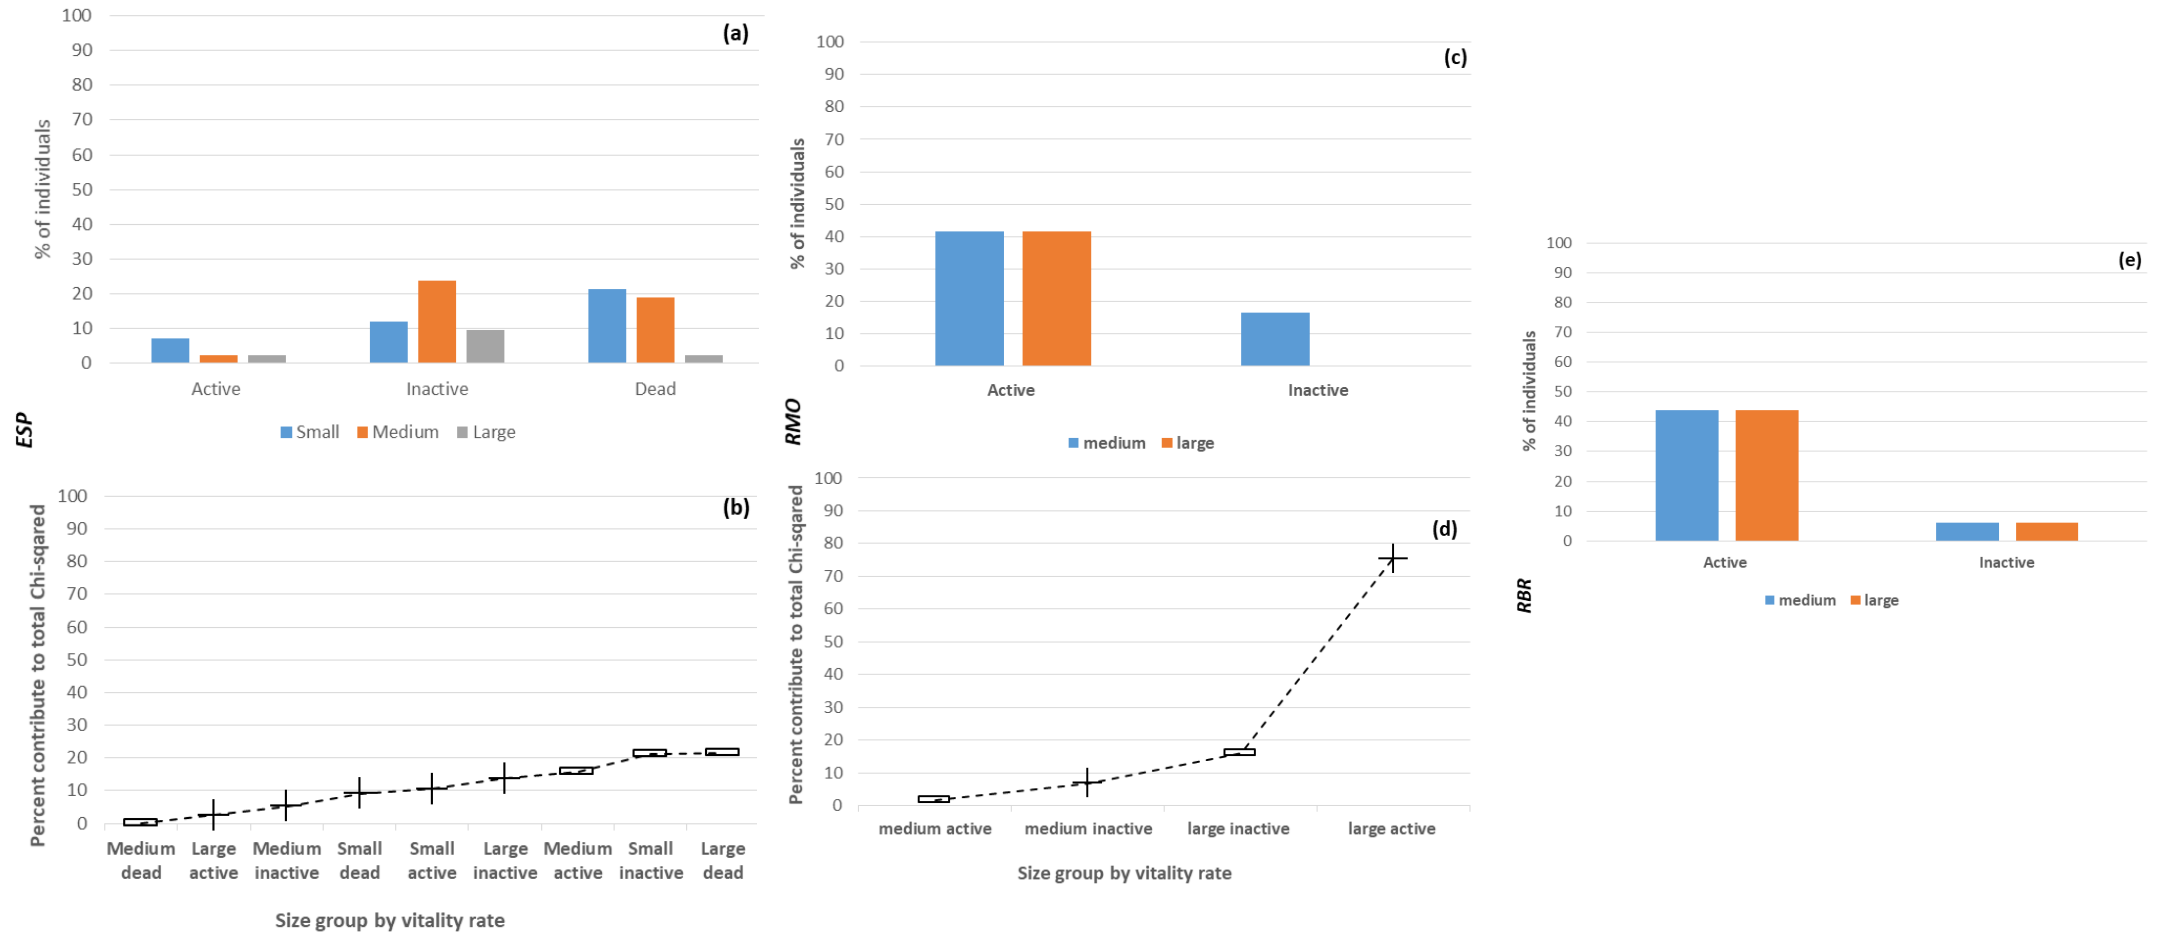

**Figure S2.** Observed percentage of the number of individuals by vitality's rate across size intervals (upper graph) and increasing order of the percent contribution of groups to total within-species variation with respect to expected values (lower graph) observed in *Etmopterus spinax* (ESP, a, b), *Raja montagui* (RMO, c, d) and *Raja brachyura* (RBR, e) after trawl catch during a fishery independent trawl survey in the Asinara Gulf during June-October 2022. Plus and minus labels on data indicate observed values higher or lower than expected, respectively.
