# Supplementary material for: Gradients of Variation in the At-Vessel Mortality Rate between Twelve Species of Sharks and Skates Sampled through a Fishery-Independent Trawl Survey in the Asinara Gulf (NW Mediterranean Sea)
Source: Biology (Basel). 2023 Feb 24;12(3):363. doi: 10.3390/biology12030363 (PMC10044918; doi:10.3390/biology12030363)
Supplement: Supplementary file 1 [file biology-12-00363-s001.zip]

Archive with 4 entries (4 files):
- Figure S2.pdf
- Figure S3.pdf
- Table S1.pdf
- Figure S1.pdf
